# Supplementary material for: Urban Aerosol Size Distributions: A Global Perspective
Source: Copernicus journal article supplement (doi:10.5194/acp-2020-92), 2020-03-24
Supplement: Supplementary file [file acp-2020-92-AC2-supplement.pdf]

**Journal:** *Atmospheric Chemistry and Physics*

**MS Title:** Urban Aerosol Size Distributions: A Global Perspective

**MS Authors:** Tianren Wu and Brandon E. Boor

**MS No.:** acp-2020-92

**MS Type:** Review Article

We appreciate the editor's efforts to help us obtain reviews and comments for our lengthy review manuscript. We have addressed RC1 and EC1 as per the editor's recommendation.
